# Circ\_0007841 accelerates ovarian cancer development through facilitating MEX3C expression by restraining miR-151-3p activity

Kejin Huang<sup>1</sup>, Dan Liu<sup>2</sup>, Changlei Su<sup>3</sup>

<sup>1</sup>Department of Gynecology, Harbin Medical University Tumor Hospital, Harbin 150001, China

<sup>2</sup>The Seventh Department of Internal Medicine, Harbin Medical University Tumor Hospital, Harbin 150001, China

<sup>3</sup>Department of General Surgery, The Second Hospital of Harbin Medical University, Harbin 150001, China

**Correspondence to:** Changlei Su; **email:** [suchanglei3304@163.com](mailto:suchanglei3304@163.com), <https://orcid.org/0000-0001-5023-6466>

**Keywords:** ovarian cancer, circ\_0007841, miR-151-3p, MEX3C, development

**Received:** December 2, 2020

**Accepted:** March 4, 2021

**Published:** April 25, 2021

**Copyright:** © 2021 Huang et al. This is an open access article distributed under the terms of the [Creative Commons Attribution License](https://creativecommons.org/licenses/by/3.0/) (CC BY 3.0), which permits unrestricted use, distribution, and reproduction in any medium, provided the original author and source are credited.

## ABSTRACT

The critical importance of circular RNAs (circRNAs) in human cancers, including ovarian cancer, has been discovered in the recent years. However, the roles of circ\_0007841 in ovarian cancer remain unknown. In the current study, it was found that circ\_0007841 expression was upregulated in ovarian cancer tissues and cell lines. Upregulation of circ\_0007841 in patients with ovarian cancer predicts poor prognosis. Loss-of-function experiments discovered that circ\_0007841 knockdown suppressed the proliferation, migration and invasion of ovarian cancer cells *in vitro* and *in vivo*. In terms of mechanism, circ\_0007841 worked as a competing endogenous RNA (ceRNA) for miR-151-3p to facilitate MEX3C expression. Restoration of MEX3C level recovered the proliferation, migration and invasion of ovarian cancer cells. In conclusion, this study demonstrated that circ\_0007841/miR-151-3p/MEX3C axis exerted important oncogenic functions in ovarian cancer.

## INTRODUCTION

Ovarian cancer (OC) is a very malignant cancer derived from the ovary [1]. Over 20,000 new patients with OC were diagnosed and about 14,000 OC resulted in deaths every year only in USA [2]. Although the approaches for OC treatment have been improved in the past years, the five year survival rate in OC patients remains less than 40% [3]. Thus, illustrating the mechanism of OC development and progression is quite important for developing novel effective therapeutic targets.

Circular RNAs (circRNAs) are another member of noncoding RNAs (ncRNAs), which are characterized by a closed loop structure [4]. CircRNA is resistant to exonuclease and very stable [5]. Hence, circRNAs may be potential biomarkers for diagnosis or prognosis. Recent evidence has demonstrated that circRNAs are extensively expressed in tumor tissues [6]. Aberrant

expression of circRNAs may cause tumorigenesis. Moreover, circRNAs participate in multiple biological processes in cancer cells through regulating proliferation, apoptosis or metastasis [7]. For instance, circSEC31A contributes to lung cancer proliferation and invasion through inhibiting miR-376a [8]. Hsa\_circ\_0004872 is a tumor suppressor to repress gastric cancer cell proliferation and migration [9]. In addition, circSEMA5A overexpression enhances bladder cancer cell proliferation and migration via facilitating ENO1 expression [10]. Therefore, it is essential to investigate the function of OC-associated circRNAs.

Circ\_0007841 is a biomarker for diagnosis in multiple myeloma [11]. Recent study indicates that circ\_0007841 also affects multiple myeloma progression and drug resistance [12]. Nevertheless, its role in OC is unclear. This current study showed that circ\_0007841 was upregulated in OC tissues and is a

prognostic biomarker. Functional experiments illustrated that circ\_0007841 promoted OC progression *in vitro* and *in vivo* through sponging miR-151-3p to enhance MEX3C expression.

## RESULTS

### Circ\_0007841 is highly expressed in OC tissues

The expression of circ\_0007841 in OC was firstly detected. Using qRT-PCR, it was found that circ\_0007841 level was increased in OC tissues compared to normal tissues (Figure 1A). Circ\_0007841 expression was also up-regulated in OC cell lines compared to IOSE80 cells (Figure 1B). To validate circ\_0007841 as a circRNA, we treated RNA with RNase R, followed by qRT-PCR. Circ\_0007841 was resistant to RNase R digestion (Figure 1C). It is noticed that circ\_0007841 was mainly distributed in the cytoplasm of OC cells (Figure 1D). Then, OC samples were divided into two groups based on circ\_0007841 median value. We found that circ\_0007841 overexpression was associated with a low survival rate (Figure 1E), indicating circ\_0007841 may be a prognostic biomarker.

### Circ\_0007841 overexpression promotes OC proliferation, migration and invasion

Next, circ\_0007841 was ectopically expressed in SKOV3 and OVCAR3 cells (Figure 2A). CCK8 assay showed that circ\_0007841 overexpression enhanced the proliferation rate (Figure 2B). Colony formation assay indicated that circ\_0007841 upregulation caused more colony formation (Figure 2C). Transwell migration and invasion assays illustrated that circ\_0007841 ectopic expression promoted cell migration and invasion (Figure 2D, 2E).

### Circ\_0007841 knockdown suppresses malignant biological behaviors

To further validate the roles of circ\_0007841, we knocked it down through shRNA in SKOV3 and OVCAR3 cells (Figure 3A). Similarly, CCK8 and colony formation assays showed that circ\_0007841 knockdown inhibited the proliferation rate of OC cells (Figure 3B, 3C). Transwell assays also suggested that circ\_0007841 downregulation resulted in less migrated or invaded cells (Figure 3D, 3E). Notably, rescue expression of circ\_0007841 abrogated the effects of its

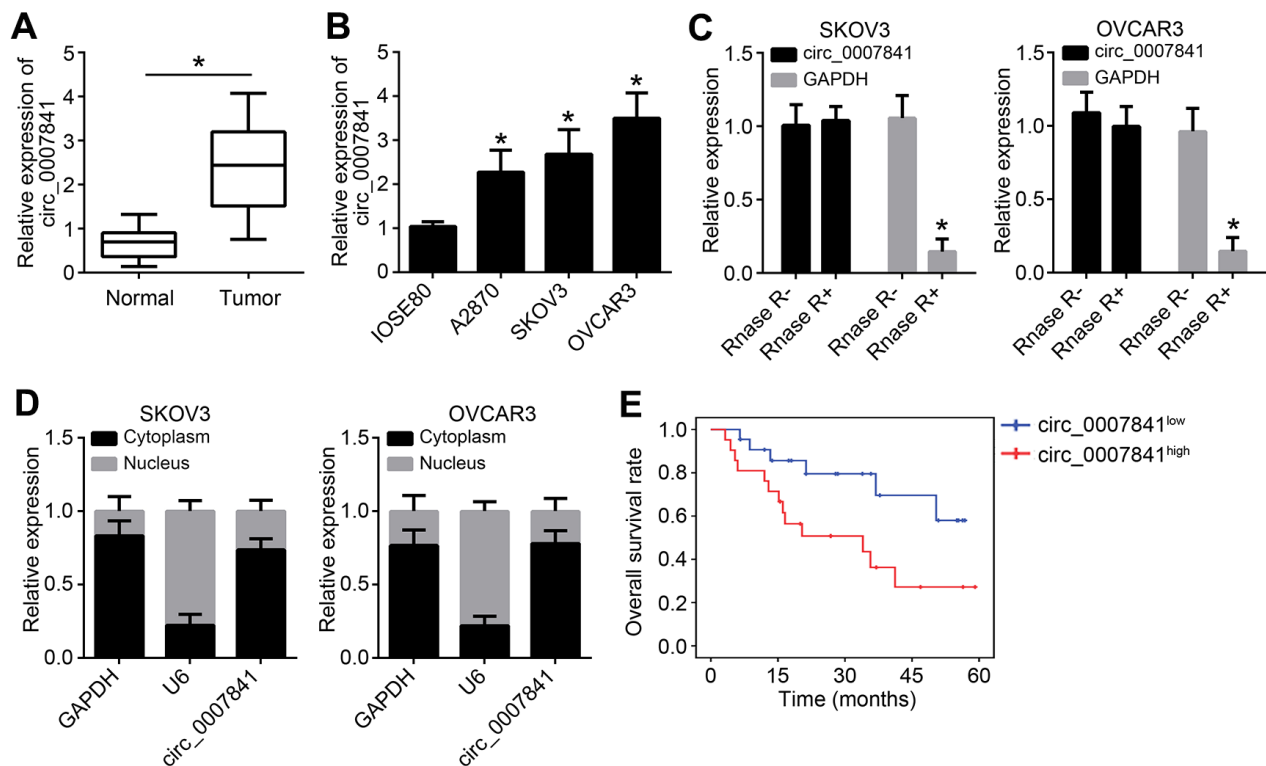

**Figure 1. circ\_0007841 is highly expressed in OC tissues.** (A) Circ\_0007841 expression in OC tissues and adjacent normal tissues was detected by qRT-PCR. (B) Circ\_0007841 expression in OC cell lines were measured by qRT-PCR. (C) Circ\_0007841 expression was analyzed after RNase RNA digestion. (D) Subcellular distribution of circ\_0007841 was analyzed by qRT-PCR. (E) Overall survival rate was determined based on circ\_0007841 median value in OC tissues. \* $P < 0.05$  by Student's t-test.

silencing (Figure 3B–3E). Thus, circ\_0007841 promotes OC progression.

### Circ\_0007841 is the ceRNA for miR-151-3p

To investigate the molecular mechanism, the potential targets of circ\_0007841 were predicted by using circinteractome (<https://circinteractome.nia.nih.gov/>). The five most potential targets were listed (Figure 4A). Luciferase reporter assay showed that only miR-151-3p mimics inhibited the activity of circ\_0007841 reporter

(Figure 4B). We then constructed corresponding wide-type and mutant luciferase reporters (Figure 4C). Luciferase reporter assay showed that only circ\_0007841-WT reporter activity was suppressed by miR-151-3p mimics (Figure 4D). Besides, miR-151-3p expression was increased after circ\_0007841 silencing (Figure 4E). On the contrary, only circ\_0007841-WT overexpression repressed miR-151-3p level in OC cells (Figure 4F). qRT-PCR analysis showed that miR-151-3p level was negatively correlated with circ\_0007841 in OC tissues (Figure 4G).

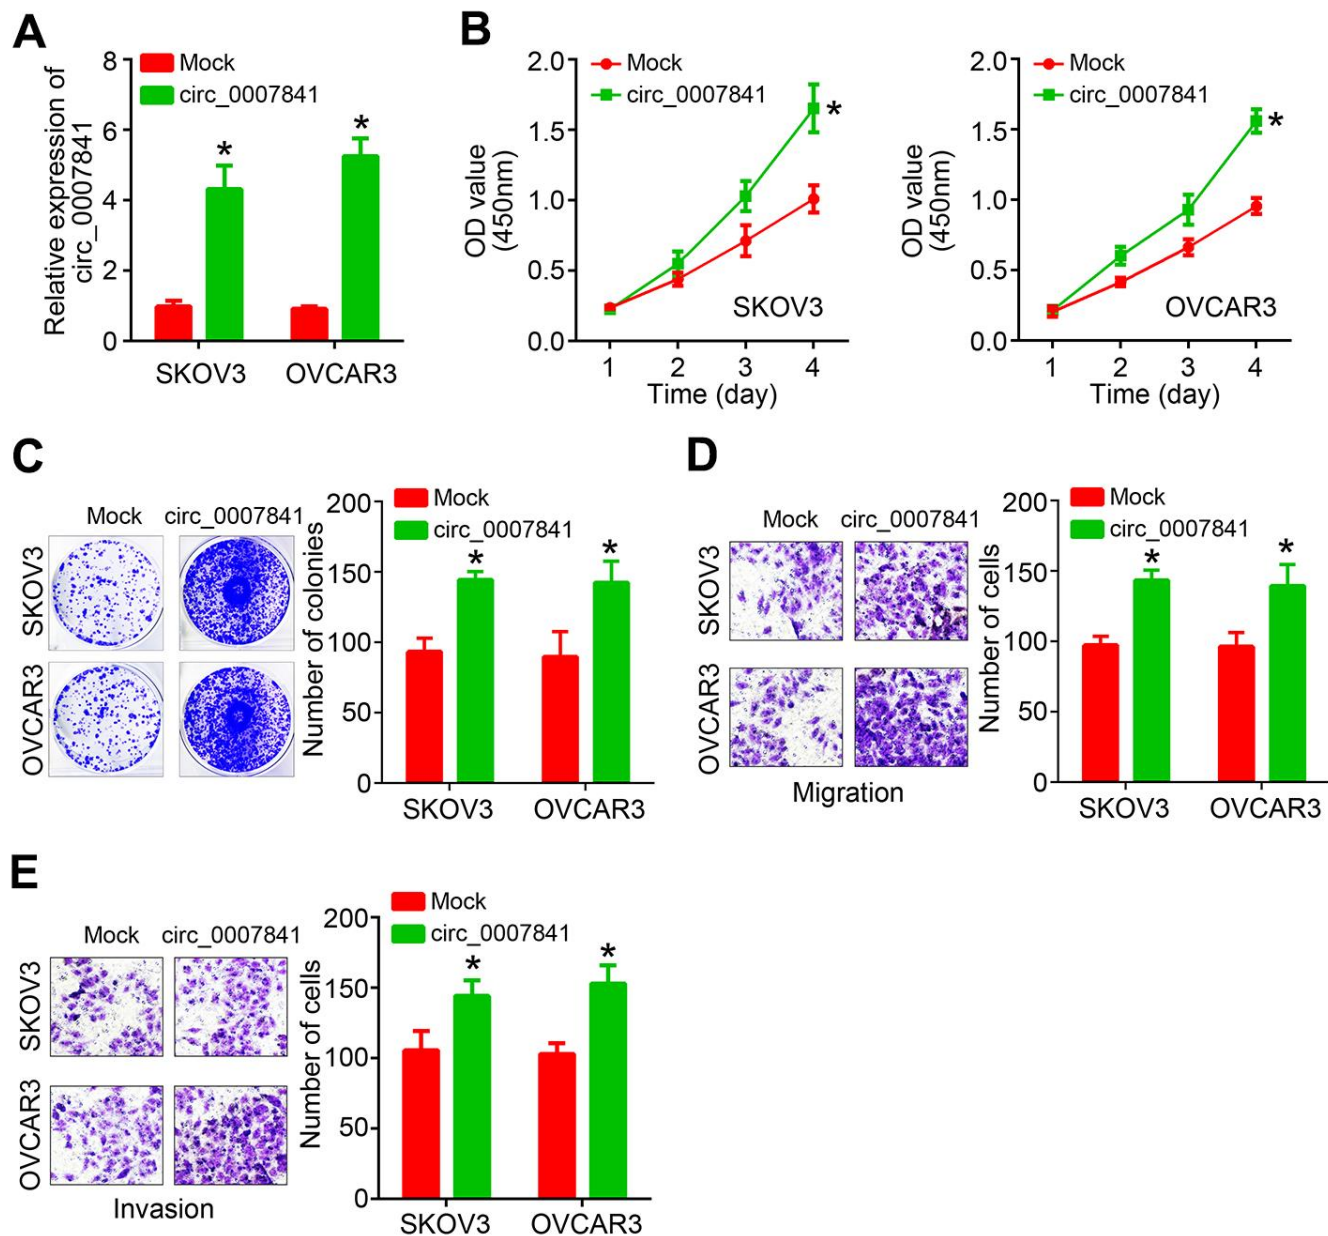

**Figure 2. circ\_0007841 overexpression promotes OC proliferation, migration and invasion.** (A) Validation of circ\_0007841 upregulation in OC cells after transfection. (B, C) CCK8 and colony formation assays used for cell proliferation analysis. (D, E) Transwell assays were performed to determine migration and invasion. \* $P < 0.05$  by Student's t-test.

## MiR-151-3p targets MEX3C

Afterwards, the targets of miR-151-3p were predicted through three online tools and MEX3C was identified (Figure 5A). Similarly, the wide-type and mutant luciferase reporters were constructed (Figure 5A). Luciferase reporter assay indicated that MEX3C-WT reporter activity was suppressed by MEX3C mimics (Figure 5B). RIP assay showed that Ago2 could enrich both MEX3C mRNA and miR-151-3p (Figure 5C). In addition, miR-151-3p mimics inhibited the expression of MEX3C (Figure 5D). We noticed that miR-151-3p level was negatively correlated with MEX3C in OC tissues (Figure 5E). However, MEX3C level was positively correlated with circ\_0007841 (Figure 5F). Circ\_0007841 knockdown suppressed MEX3C expression whereas miR-151-3p inhibitors reversed it (Figure 5G), indicating that circ\_0007841 promotes MEX3C expression via acting as the ceRNA for miR-151-3p.

## Circ\_0007841 promotes OC progression through miR-151-3p/MEX3C axis

It was found that MEX3C was upregulated in OC tissues (Figure 6A). To explore whether circ\_0007841

promotes OC progression relying on miR-151-3p/MEX3C axis, rescue assays were carried out. CCK8 and colony formation results showed that miR-151-3p inhibition or MEX3C overexpression rescued the inhibitory effects of circ\_0007841 knockdown on proliferation (Figure 6B, 6C). Similarly, Transwell assays showed that miR-151-3p inhibition or MEX3C overexpression rescued the inhibitory effects of circ\_0007841 knockdown on migration and invasion (Figure 6D, 6E). To confirm the role of circ\_0007841/miR-151-3p/MEX3C axis *in vivo*, animal experiments were performed. Circ\_0007841 knockdown suppressed tumor growth while miR-151-3p inhibition or MEX3C overexpression recovered tumor propagation (Figure 6F, 6G).

## DISCUSSION

With the development of high-throughput sequencing technology, an increasing number of circRNAs have been identified. Emerging evidence implies that important involvement of circRNA in human cancers [6]. In this study, we showed that circ\_0007841 was highly expressed in OC tissues and associated with poor prognosis. Gain-of-function and loss-of-function

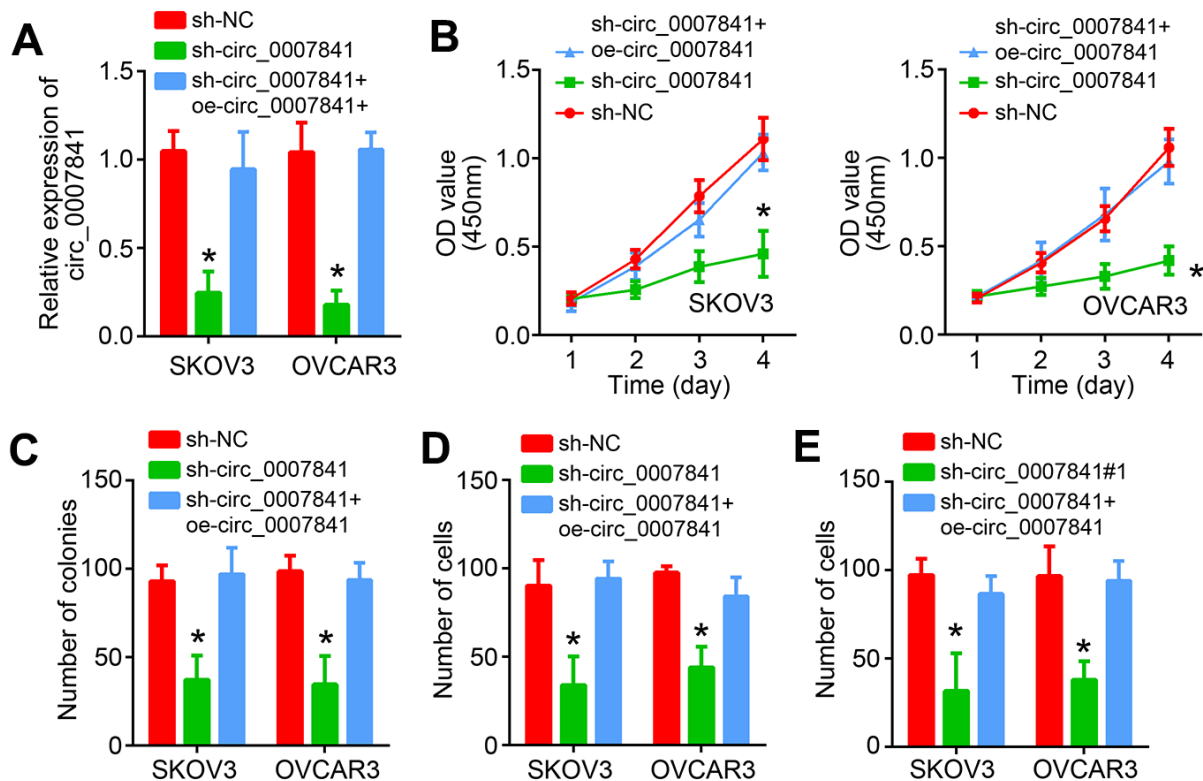

**Figure 3. circ\_0007841 knockdown suppresses malignant biological behaviors.** (A) Validation of circ\_0007841 silencing by qRT-PCR. (B, C) Cell proliferation was detected by using CCK8 and Transwell assays. (D, E) Transwell assays were carried out to analyze migration and invasion. \* $P < 0.05$  by Student's t-test.



experiments demonstrated that circ\_0007841 promoted OC cell proliferation, migration and invasion. Animal experiments also illustrated that circ\_0007841 promoted OC growth *in vivo*.

In past few years, more and more works have discovered the functions of circRNA in cancer, including OC. For example, circRNA circEXOC6B suppresses OC proliferation and invasion through

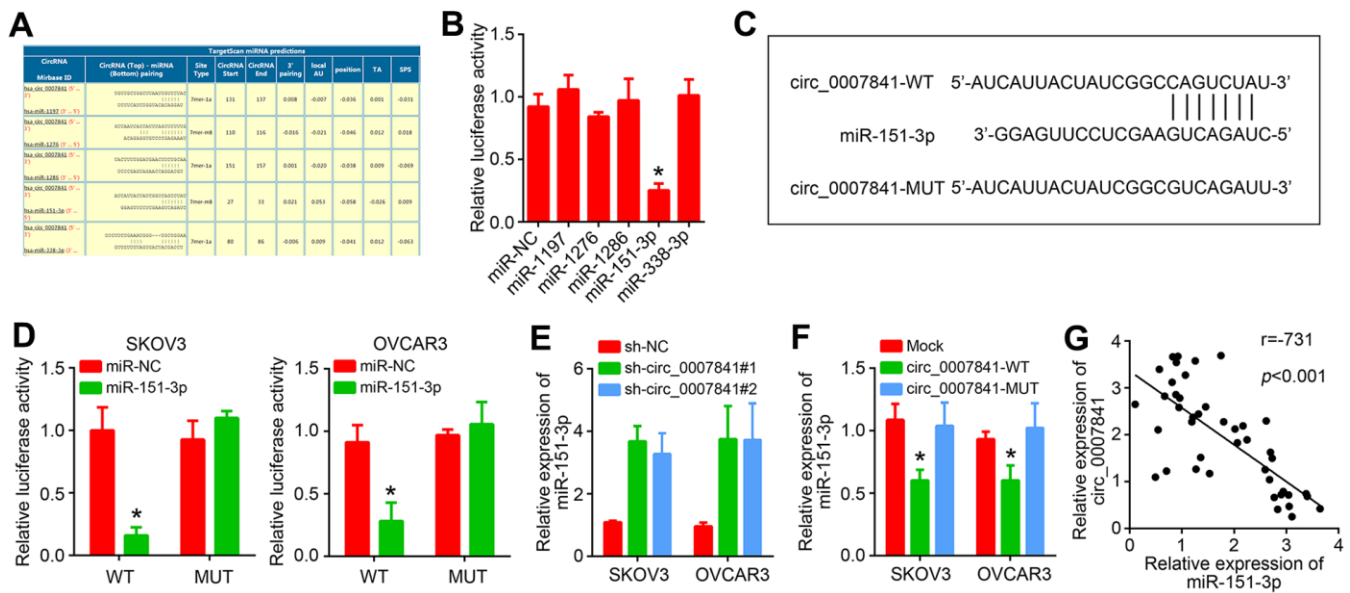

**Figure 4. circ\_0007841 is the ceRNA for miR-151-3p.** (A) Predicted targets of circ\_0007841 by circinteractome. (B) Luciferase reporter assay was performed to validate the interaction between circ\_0007841 and predicted targets. (C) Construction of wild-type (WT) and mutant (MUT) reporter vector. (D) Luciferase reporter assay using constructed luciferase reporters. (E) qRT-PCR analysis of miR-151-3p expression after circ\_0007841 silencing. (F) qRT-PCR analysis of miR-151-3p expression after circ\_0007841 overexpression. (G) Expression correlation between circ\_0007841 and miR-151-3p in OC tissues. \*P<0.05 by Student's t-test.

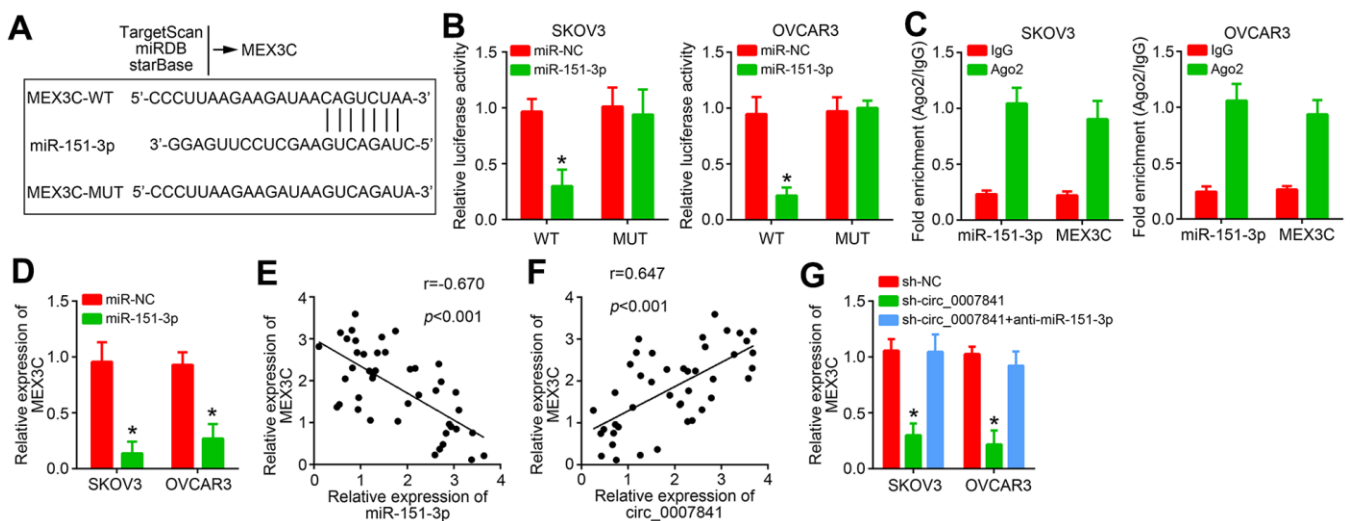

**Figure 5. miR-151-3p targets MEX3C.** (A) MEX3C was predicted to be the target of miR-151-3p via TargetSan, miRDB and starBase. (B) Luciferase reporter assay. (C) RIP assay was performed to validate the interaction between miR-151-3p and MEX3C. (D) Relative expression of MEX3C was analyzed by qRT-PCR. (E) Expression correlation between MEX3C and miR-151-3p in OC tissues. (F) Expression correlation between MEX3C and circ\_0007841 in OC tissues. (G) Relative expression of MEX3C was analyzed by qRT-PCR after transfection. \*P<0.05 by Student's t-test.

inhibiting miR-421 [13]. Circular RNA S-7 is upregulated in OC and promotes EMT by restraining miR-641 [14]. In addition, circRNA ITCH is an anti-cancer gene to inhibit OC growth and metastasis via repressing miR-106a [15]. However, in other types of cancer, there is no similar study about circ\_0007841 roles. In our study, we discovered its overexpression in OC tissues and implied that circ\_0007841 may be a prognostic biomarker. Finally, we demonstrated that circ\_0007841 promotes OC growth *in vitro* and *in vivo*. Thus, our data for the first time defined the oncogenic roles of circ\_0007841 in OC.

CircRNAs were discovered to exert competing endogenous RNA (ceRNA) for miRNAs in cancer [7]. For instance, circRNA RNF111 is the ceRNA for miR-27b to promote gastric cancer proliferation [16]. Circ-ZNF652 is the ceRNA for miR-29a to enhance liver cancer growth and metastasis [17]. Circ\_0007841 has been shown to sponge miR-338 and miR-129 multiple myeloma [12, 18]. In this study, we performed bioinformatics analysis and finally confirmed that circ\_0007841 was the ceRNA for miR-151-3p in OC. miR-151-3p is involved in several cancers, such as breast cancer [19], nasopharyngeal carcinoma [20] and colon cancer [21]. Whether miR-151-3p has a similar

role in OC is unknown. Our data showed that miR-151-3p expression was inhibited by miR-151-3p. And miR-151-3p inhibition rescued the proliferation, migration and invasion of OC cells, suggesting that it is a tumor suppressor.

Afterwards, bioinformatics was used to search the targets of miR-151-3p. We identified MEX3C. Luciferase reporter assay and RIP assay demonstrated the interaction between miR-151-3p and MEX3C. Besides, we found that circ\_0007841 shRNA and miR-151-3p mimics suppressed MEX3C expression. More importantly, MEX3C expression was positively correlated with circ\_0007841 and negatively correlated with miR-151-3p in OC tissues. A recent research indicates that MEX3C promotes bladder cancer development by regulating metabolism [22]. Whether MEX3C regulates OC remains unknown. Our study showed that MEX3C was upregulated in OC tissues. MEX3C overexpression promoted OC proliferation, migration and invasion *in vitro* and *in vivo*. Therefore, MEX3C is a new oncogene in OC.

Summarily, we confirmed the significant roles of circ\_0007841 in OC malignant progression. Our data demonstrated that circ\_0007841 worked as the ceRNA

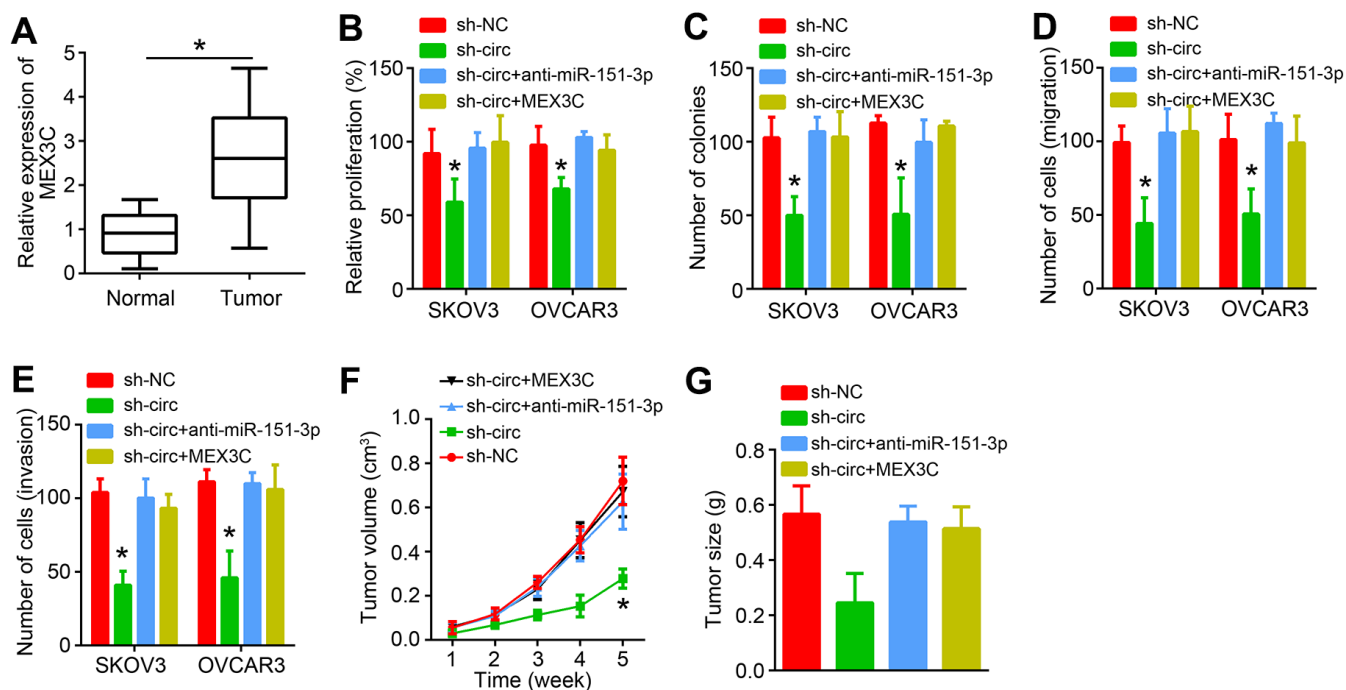

**Figure 6. circ\_0007841 promotes OC progression through miR-151-3p/MEX3C axis.** (A) MEX3C expression was analyzed in OC tissues by qRT-PCR. (B, C) CCK8 and colony formation assays were performed to analyze proliferation. (D, E) Transwell assay was conducted to detect migration and invasion. (F) Tumor volumes were measured every one week. (G) Tumor size was measured after five weeks. \* $P < 0.05$  by Student's t-test.

for miR-151-3p to facilitate MEX3C expression and promote OC cell proliferation, migration and invasion. However, the downstream signaling of miR-151-3p/MEX3C is still elusive, which requires investigation in the future.

## **MATERIALS AND METHODS**

### **Tissues collection**

43 OC tissues and adjacent normal tissues were collected from The Second Hospital of Harbin Medical University. Tissues were stored in liquid nitrogen and not treated by chemotherapy or radiotherapy before surgery. Association of circ\_0007841 level and clinicopathological parameters in OC patients was presented in Table 1. This study was approved by the Ethics Committee of The Second Hospital of Harbin Medical University. All patients provided written informed consents.

### **Cell culture**

Human OC cell lines and normal ovarian epithelial IOSE80 cells were obtained from American Type Culture Collection (ATCC, Rockville, MD, USA). Cells were cultured using DMEM medium supplemented with 10% FBS and 100 U/mL of penicillin/streptomycin. All plasmids and oligonucleotides were purchased from RiboBio (Guangzhou, China). Transfection was carried out through Lipofectamine 3000 reagent following the manufacturer's protocols.

### **RNA extraction and qRT-PCR**

Total RNA was extracted using Trizol reagent (Thermo Fisher Scientific) and utilized to synthesize cDNA through iGh Capacity cDNA Reverse Transcription Kit (Thermo Fisher Scientific). qPCR was performed using SYBR Premix Ex Taq™ kit (Takara). Relative expression was normalized to GAPDH or U6 and calculated through  $2^{-\Delta\Delta Ct}$  method.

### **Cell proliferation assays**

For Cell Counting Kit 8 (CCK8, Beyotime, China) assay, Cells were seeded into 96-well plates and cultured. At indicated time points, CCK8 solution was added and incubated for 2 hours. OD values at 450 nm were detected through a microplate reader (Bio-Rad Laboratories, Hercules, CA, USA).

For colony formation assay, cells were plated into 6-well plates and cultured for 14 days. Finally, colonies was fixed with 4 % paraformaldehyde, stained with crystal violet and photographed.

### **Transwell assay**

For migration assay, cells were seeded into the upper part with 200  $\mu$ l serum-free medium. The lower chamber was filled with 600  $\mu$ l complete medium. After cultured for 48 h, the cells on the bottom chamber was fixed with 4 % paraformaldehyde, stained with crystal violet and photographed. For invasion assay, the upper chamber was pre-coated with Matrigel and other steps were the same as migration assay.

### **Bioinformatics analysis**

The correlation between miR-151-3p and MEX3C was predicted by using TargetScan, miRDB and starBase tools.

### **Dual-luciferase reporter assay**

Reporter vectors were obtained through inserting circ\_0007841 or MEX3C sequence into the PGL3 vector (Promega, Madison, WI). For luciferase reporter assay, miR-151-3p and reporter vectors were co-transfected into cells using Lipofectamine 3000. After 48 h, the luciferase activity was measured using the dual-Luciferase Reporter Assay System (Promega, Sunnyvale, CA) based on the manufacturer's protocols.

### **RNA-immunoprecipitation (RIP) assay**

RIP assay was performed using Magna RIP RNA-binding protein immunoprecipitation kit (Millipore, MA) according to manufacturer's instructions. Cell lysates were incubated with IgG (as a negative control) and Ago2 antibody. Then precipitated RNA was analyzed by qPCR.

### **Animal experiments**

6-week-old BALB/c nude mice were randomly divided into two groups (n=5 for each group). Then SKOV3 cells were inoculated subcutaneously into the flanks of nude mice. Tumor volumes were measured every one week according to the formula: Tumor volume = (length $\times$ width<sup>2</sup>)/2. Animal experiments were approved by the Ethics Committee of The Second Hospital of Harbin Medical University.

### **Statistical analyses**

Results were analyzed by GraphPad Prism 7.0 software (GraphPad, La Jolla, CA, USA) and expressed as the mean  $\pm$  SD. All experiments were repeated at least three times. P values were analyzed using Student's t-test for two group comparison or one-way ANOVA for multiple group comparison. Kaplan Meier survival

**Table 1. Association of circ\_0007841 level and clinicopathological parameters in OC patients.**

| Parameters           | Low (n=22) | High (n=21) | P-value |
|----------------------|------------|-------------|---------|
| Age                  |            |             | 0.747   |
| ≥50 years            | 16         | 14          |         |
| <50 years            | 6          | 7           |         |
| Pathological subtype |            |             | 0.721   |
| Serous               | 18         | 16          |         |
| Other                | 4          | 5           |         |
| Tumor size           |            |             | 0.033   |
| ≥1 cm                | 8          | 15          |         |
| <1 cm                | 14         | 6           |         |
| FIGO stage           |            |             | 0.031   |
| I-II                 | 13         | 5           |         |
| III-IV               | 9          | 16          |         |
| Pathological grade   |            |             | 0.033   |
| G1-G2                | 14         | 6           |         |
| G3                   | 8          | 15          |         |

analysis was used for analysis of survival rate and P-value was calculated by the log-rank test.  $P < 0.05$  was considered as statistically significant.

## AUTHOR CONTRIBUTIONS

KH performed experiments and collected data. DL analyzed data. CS initiated the work and wrote the paper.

## CONFLICTS OF INTEREST

The authors declare that they have no conflicts of interest.

## FUNDING

This study was supported by The Second Hospital of Harbin Medical University.

## REFERENCES

1. La Vecchia C. Ovarian cancer: epidemiology and risk factors. *Eur J Cancer Prev.* 2017; 26:55–62. <https://doi.org/10.1097/CEJ.0000000000000217> PMID:26731563
2. Siegel RL, Miller KD, Jemal A. Cancer statistics, 2020. *CA Cancer J Clin.* 2020; 70:7–30. <https://doi.org/10.3322/caac.21590> PMID:31912902
3. Siegel RL, Miller KD, Jemal A. Cancer statistics, 2016. *CA Cancer J Clin.* 2016; 66:7–30. <https://doi.org/10.3322/caac.21332> PMID:26742998
4. Hsiao KY, Sun HS, Tsai SJ. Circular RNA - New member of noncoding RNA with novel functions. *Exp Biol Med* (Maywood). 2017; 242:1136–41. <https://doi.org/10.1177/1535370217708978> PMID:28485684
5. Zhang Y, Zhang XO, Chen T, Xiang JF, Yin QF, Xing YH, Zhu S, Yang L, Chen LL. Circular intronic long noncoding RNAs. *Mol Cell.* 2013; 51:792–806. <https://doi.org/10.1016/j.molcel.2013.08.017> PMID:24035497
6. Wei J, Wang J, Gao X, Qi F. Identification of differentially expressed circRNAs and a novel hsa\_circ\_0000144 that promote tumor growth in gastric cancer. *Cancer Cell Int.* 2019; 19:268. <https://doi.org/10.1186/s12935-019-0975-y> PMID:31636511
7. Zhou SY, Chen W, Yang SJ, Li J, Zhang JY, Zhang HD, Zhong SL, Tang JH. Circular RNA circVAPA regulates breast cancer cell migration and invasion via sponging miR-130a-5p. *Epigenomics.* 2020; 12:303–17. <https://doi.org/10.2217/epi-2019-0124> PMID:31920104
8. Cheng F, Yu J, Zhang X, Dai Z, Fang A. CircSEC31A Promotes the Malignant Progression of Non-Small Cell Lung Cancer Through Regulating SEC31A Expression via Sponging miR-376a. *Cancer Manag Res.* 2020; 12:11527–39. <https://doi.org/10.2147/CMAR.S280124> PMID:33204164
9. Ma C, Wang X, Yang F, Zang Y, Liu J, Wang X, Xu X, Li W, Jia J, Liu Z. Circular RNA hsa\_circ\_0004872 inhibits



- gastric cancer progression via the miR-224/Smad4/ADAR1 successive regulatory circuit. *Mol Cancer*. 2020; 19:157.  
<https://doi.org/10.1186/s12943-020-01268-5>  
 PMID:33172486
10. Wang L, Li H, Qiao Q, Ge Y, Ma L, Wang Q. Circular RNA circSEMA5A promotes bladder cancer progression by upregulating ENO1 and SEMA5A expression. *Aging (Albany NY)*. 2020; 12:21674–86.  
<https://doi.org/10.18632/aging.103971>  
 PMID:33176280
  11. Gao M, Li C, Xiao H, Dong H, Jiang S, Fu Y, Gong L. hsa\_circ\_0007841: A Novel Potential Biomarker and Drug Resistance for Multiple Myeloma. *Front Oncol*. 2019; 9:1261.  
<https://doi.org/10.3389/fonc.2019.01261>  
 PMID:31803627
  12. Wang Y, Lin Q, Song C, Ma R, Li X. Depletion of circ\_0007841 inhibits multiple myeloma development and BTZ resistance via miR-129-5p/JAG1 axis. *Cell Cycle*. 2020; 19:3289–302.  
<https://doi.org/10.1080/15384101.2020.1839701>  
 PMID:33131409
  13. Wang Z, Zhang W, Fang J, Xie P, Miao M, Yang H. Circular RNA circEXOC6B Inhibits the Progression of Ovarian Cancer by Sponging miR-421 and Regulating RUS1 Expression. *Onco Targets Ther*. 2020; 13:8233–43.  
<https://doi.org/10.2147/OTT.S243040>  
 PMID:32884301
  14. Zhang F, Xu Y, Ye W, Jiang J, Wu C. Circular RNA S-7 promotes ovarian cancer EMT via sponging miR-641 to up-regulate ZEB1 and MDM2. *Biosci Rep*. 2020; 40:BSR20200825.  
<https://doi.org/10.1042/BSR20200825>  
 PMID:32667627
  15. Lin C, Xu X, Yang Q, Liang L, Qiao S. Circular RNA ITCH suppresses proliferation, invasion, and glycolysis of ovarian cancer cells by up-regulating CDH1 via sponging miR-106a. *Cancer Cell Int*. 2020; 20:336.  
<https://doi.org/10.1186/s12935-020-01420-7>  
 PMID:32714095
  16. Wang Z, Jiang Z, Zhou J, Liu Z. circRNA RNF111 regulates the growth, migration and invasion of gastric cancer cells by binding to miR-27b-3p. *Int J Mol Med*. 2020; 46:1873–85.  
<https://doi.org/10.3892/ijmm.2020.4709>  
 PMID:33000178
  17. Li Y, Zang H, Zhang X, Huang G. Exosomal Circ-ZNF652 Promotes Cell Proliferation, Migration, Invasion and Glycolysis in Hepatocellular Carcinoma via miR-29a-3p/GUCD1 Axis. *Cancer Manag Res*. 2020; 12:7739–51.  
<https://doi.org/10.2147/CMAR.S259424>  
 PMID:32943922
  18. Wang Y, Lin Q, Song C, Ma R, Li X. Circ\_0007841 promotes the progression of multiple myeloma through targeting miR-338-3p/BRD4 signaling cascade. *Cancer Cell Int*. 2020; 20:383.  
<https://doi.org/10.1186/s12935-020-01475-6>  
 PMID:32782441
  19. Yeh TC, Huang TT, Yeh TS, Chen YR, Hsu KW, Yin PH, Lee HC, Tseng LM. miR-151-3p Targets TWIST1 to Repress Migration of Human Breast Cancer Cells. *PLoS One*. 2016; 11:e0168171.  
<https://doi.org/10.1371/journal.pone.0168171>  
 PMID:27930738
  20. Liu H, Cheng Y, Xu Y, Xu H, Lin Z, Fan J, Lang J. The inhibition of tumor protein p53 by microRNA-151a-3p induced cell proliferation, migration and invasion in nasopharyngeal carcinoma. *Biosci Rep*. 2019; 39:BSR20191357.  
<https://doi.org/10.1042/BSR20191357>  
 PMID:31652456
  21. Yue C, Chen X, Li J, Yang X, Li Y, Wen Y. miR-151-3p Inhibits Proliferation and Invasion of Colon Cancer Cell by Targeting Close Homolog of L1. *J Biomed Nanotechnol*. 2020; 16:876–84.  
<https://doi.org/10.1166/jbn.2020.2941>  
 PMID:33187583
  22. Chao H, Deng L, Xu F, Yu Z, Xu X, Huang J, Zeng T. MEX3C regulates lipid metabolism to promote bladder tumorigenesis through JNK pathway. *Onco Targets Ther*. 2019; 12:3285–94.  
<https://doi.org/10.2147/OTT.S199667>  
 PMID:31118679
